# Supplementary material for: Evaluation of Biodistribution of Sulforaphane after Administration of Oral Broccoli Sprout Extract in Melanoma Patients with Multiple Atypical Nevi
Source: Oxford University Press journal article supplement (doi:10.1158/1940-6207.capr-17-0268), 2018-04-24
Supplement: 19406207capr170268-sup-188210_3_supp_4660216_p6rt42.docx [file 19406207capr170268-sup-188210_3_supp_4660216_p6rt42.docx]

**Supplementary Table 2.** Skin sulforaphane concentration post-BSE-SFN administration by dose group and day.

| **Study Arm** | **Day** | **Median Sulforaphane Concentration (ng/g)** | **Sulforaphane Concentration Range (ng/g)** |
| --- | --- | --- | --- |
| 50 µmol  (n=6) | Day 1 | 0.0 | (0.0–8.2) |
| Day 2 | 4.1 | (0.0–15.2) |
| Day 28 | 0.0 | (0.0–21.8) |
| 100 µmol  (n=6) | Day 1 | 0.0 | (0.0–0.0) |
| Day 2 | 0.0 | (0.0–11.8) |
| Day 28 | 3.1 | (0–18.9) |
| 200 µmol  (n=5) | Day 1 | 0.0 | (0.0–0.0) |
| Day 2 | 53.5 | (0.0–60.3) |
| Day 28 | 34.1 | (0.0–63.6) |
